# Supplementary material for: Preparation of monoethyl fumarate-based molecularly imprinted polymers and their application as a solid-phase extraction sorbent for the separation of scopolamine from tropane alkaloids
Source: PubMed Central journal article supplement — RSC Adv. 2019 Jun 25;9(34):19712–9. doi: 10.1039/c9ra03542g (PMC9065296; doi:10.1039/c9ra03542g), 2019-06-25
Supplement: RA-009-C9RA03542G-s001.pdf [file RA-009-C9RA03542G-s001.pdf]

# Preparation of monoethyl fumarate-based molecularly imprinted polymers and their application as SPE sorbent for enrichment of scopolamine from tropane alkaloids

Jie Zuo<sup>a</sup>, Xingyuan Zhang<sup>a\*</sup>, Xinyu Li<sup>a</sup>, Zhiwei Li<sup>a</sup>, Zongren Li<sup>a</sup>, Honghong Li<sup>b</sup>, Wencheng Zhang<sup>b\*</sup>.

<sup>a</sup> CAS Key Laboratory of Soft Matter Chemistry, Department of Polymer Science and Engineering, University of Science and Technology of China, Hefei 230026, PR China. E-mail: zzym@ustc.edu.cn.

<sup>b</sup> Engineering Research Center of Bio-Process of Ministry of Education, School of Food and Biological Engineering, Hefei University of Technology, Hefei, P. R. China. E-mail: zwc1012@163.com.

## 1. <sup>1</sup>H NMR spectra

The structure of synthetic functional monomer was identified using <sup>1</sup>H NMR spectra. As seen from Fig. S1, <sup>1</sup>H NMR (400 MHz, DMSO-d<sub>6</sub>) δ: 1.21 (t, J=8 Hz, 3H), 4.14 (dd, J<sub>1</sub>=4 Hz, J<sub>2</sub>=8 Hz, 2H), 6.36 (q, J=12Hz, 2H), 12.97 (s, 1H), which proved

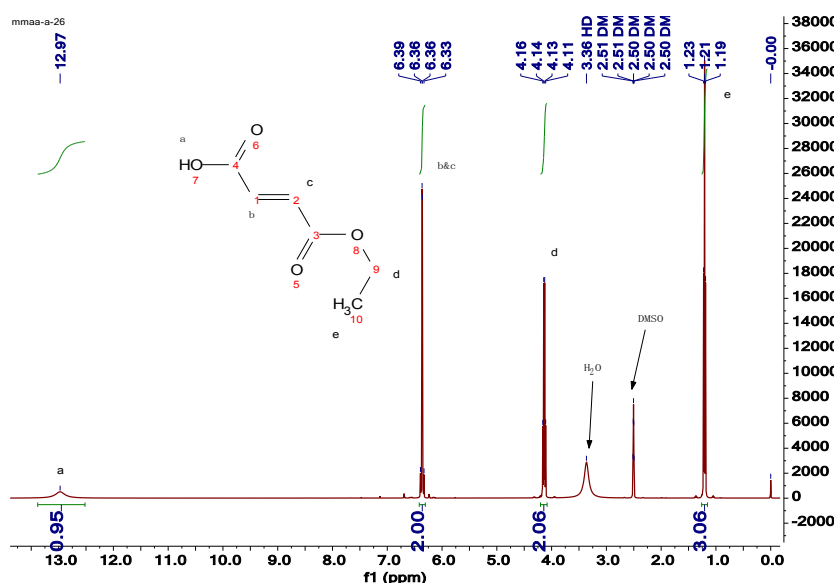

that MFMA had been successfully synthesized.

Fig. S1. <sup>1</sup>H NMR spectra of MFMA.

## 2. Method validation

To verify the MISPE system integrated with HPLC, the favorable linear response was achieved within the scope of 8.0–4.0×10<sup>4</sup> μg L<sup>-1</sup>. with R<sup>2</sup> of 0.9982. Furthermore, limit of detection (LOD), which stands for minimum detectable concentration, was 2.2

$\mu\text{g L}^{-1}$ . Limit of quantification (LOQ) that represents smallest amount of analyte measured with reasonable accuracy was  $6.5 \mu\text{g L}^{-1}$ . To evaluate the precision of the MISPE for scopolamine analysis, three Hindu Datura samples each added with scopolamine ( $0.1 \text{ mg L}^{-1}$ ) were researched by MISPE system to obtain the relative standard deviation (RSD) of 2.4%.

In order to further evaluate the MISPE system, the established a non-aqueous SPE method using silica based strong cation exchange (SCX)<sup>37</sup> (SCX-SPE) were applied to study the Hindu Datura and Belladonna samples. The data summarized in Table S1 exhibited that the recovery of MFMA-MISPE method (96.0–106.0%) was higher than that of SCX-SPE method (78.0-85.0%). The above results indicate that the MFMA-MISPE method is more advantageous than the SCX-SPE method in enrichment of scopolamine from plants samples. Therefore, the MFMA-MISPE system integrated with HPLC is more desirable for the extraction and detection of scopolamine in the mixture of tropane alkaloids.

**Table S1.** Comparison of the MFMA-MISPE method with SCX-SPE method.

| Samples      | Added<br>( $\mu\text{g L}^{-1}$ ) | Detected ( $\mu\text{g L}^{-1}$ ) |         | Recovery (%) |         | RSD (%)    |         |
|--------------|-----------------------------------|-----------------------------------|---------|--------------|---------|------------|---------|
|              |                                   | MFMA-MISPE                        | SCX-SPE | MFMA-MISPE   | SCX-SPE | MFMA-MISPE | SCX-SPE |
|              | -                                 | ND <sup>a</sup>                   | ND      | -            | -       | -          | -       |
| Hindu Datura | 50.0                              | 51.0                              | 45.0    | 102.0        | 85.0    | 3.4        | 4.5     |
|              | 100.0                             | 96.0                              | 80.0    | 96.0         | 80.0    | 2.7        | 5.2     |
|              | -                                 | ND                                | ND      | -            | -       | -          | -       |
| Belladonna   | 50.0                              | 53.0                              | 41.0    | 106.0        | 82.0    | 4.1        | 6.7     |
|              | 100.0                             | 99.0                              | 78.0    | 99.0         | 78.0    | 3.5        | 5.5     |

<sup>a</sup> ND is not detected
